# Supplementary material
Source: Springer Nature journal article supplement (https://www.springermedizin.de/resource/supplementary/13058_2013_3271_MOESM7_ESM.pdf/9703614)

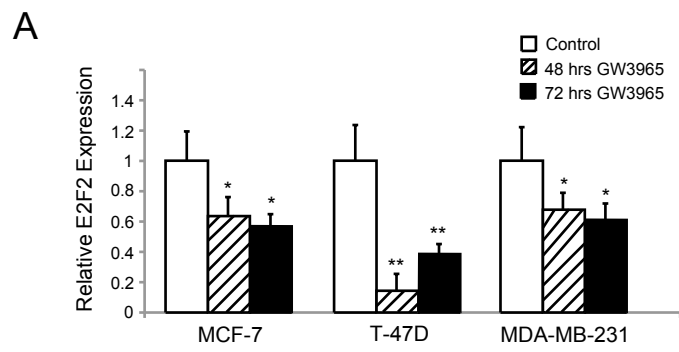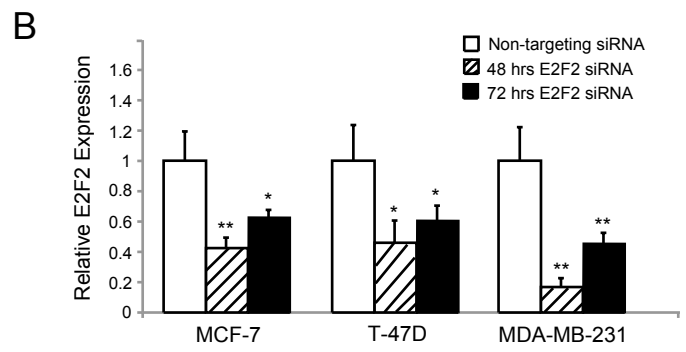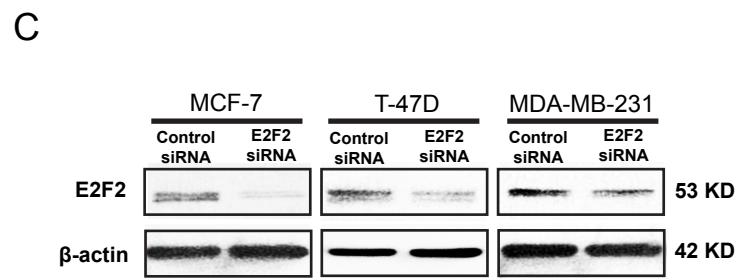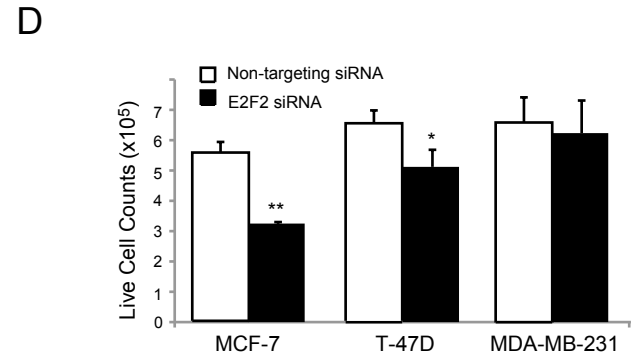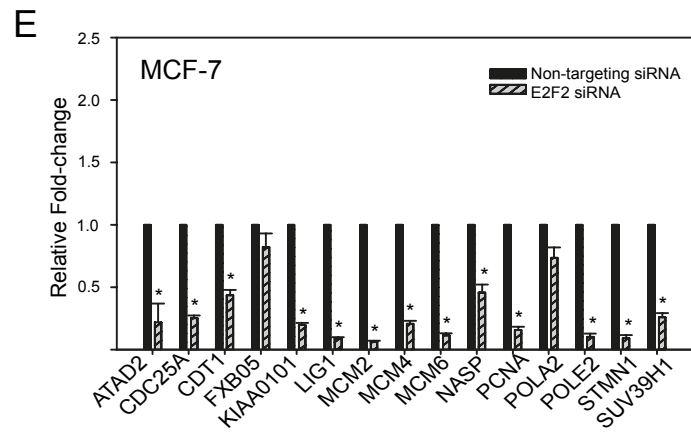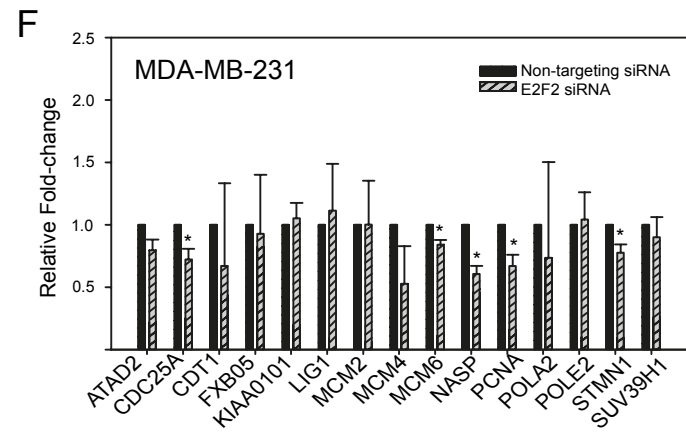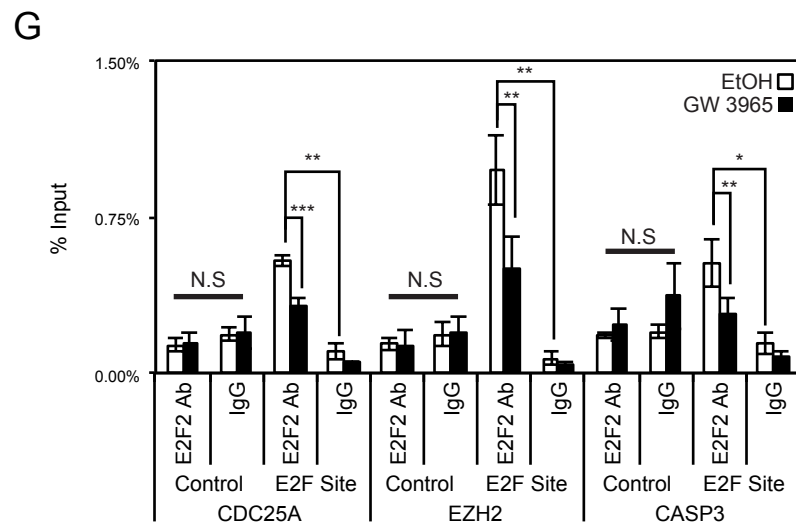

Supplement: MOESM7 [file 9703614]
